# Supplementary material for: Risk factors in patients with COVID-19 developing severe liver injury during hospitalisation
Source: PubMed Central journal article supplement — Gut. 2020 Jun 22;70(3):628–9. doi: 10.1136/gutjnl-2020-321913 (PMC7873415; doi:10.1136/gutjnl-2020-321913), 2020-06-22
Supplement: gutjnl-2020-321913supp001.pdf [file gutjnl-2020-321913supp001.pdf]

**Supplementary Table 1. The clinical features of COVID-19 patients with mild and severe liver injury during hospitalization**

| Variable                              | COVID-19 patients with mild liver injury during hospitalization (n=103) | COVID-19 patients with severe liver injury during hospitalization (n=30) | P-value |
|---------------------------------------|-------------------------------------------------------------------------|--------------------------------------------------------------------------|---------|
| Gender (Male/Female)                  | 44/59                                                                   | 14/16                                                                    | 0.835   |
| Age (year; mean $\pm$ SD)             | 44.84 $\pm$ 18.17                                                       | 49.83 $\pm$ 12.26                                                        | 0.160   |
| Hospitalization time (median [IQR])   | 17.00 [13.00, 24.00]                                                    | 17.50 [12.25, 24.00]                                                     | 0.903   |
| Severe COVID-19 patients              | 18 (17.5%)                                                              | 7 (23.3%)                                                                | 0.648   |
| Co-existing disorder                  |                                                                         |                                                                          |         |
| Diabetes                              | 9 (8.7%)                                                                | 4 (13.3%)                                                                | 0.489   |
| Hypertension                          | 13 (12.6%)                                                              | 6 (20.0%)                                                                | 0.374   |
| Coronary heart disease                | 4 (3.9%)                                                                | -                                                                        | 0.574   |
| Cancer                                | 6 (5.8%)                                                                | 1 (3.3%)                                                                 | 1.000   |
| Chronic obstructive pulmonary disease | 4 (3.9%)                                                                | -                                                                        | 0.574   |
| Chronic renal disease                 | 1 (1.0%)                                                                | 1 (3.3%)                                                                 | 0.402   |
| Symptoms                              |                                                                         |                                                                          |         |
| Fever                                 | 58 (56.3%)                                                              | 16 (53.3%)                                                               | 0.836   |
| Fatigue                               | 22 (21.4%)                                                              | 8 (26.7%)                                                                | 0.620   |
| Cough                                 | 44 (42.7%)                                                              | 12 (40.0%)                                                               | 0.836   |
| Sputum                                | 45 (43.7%)                                                              | 13 (43.3%)                                                               | 1.000   |
| Muscle ache                           | 10 (9.7%)                                                               | 4 (13.3%)                                                                | 0.518   |
| Shortness of breath                   | 23 (22.3%)                                                              | 9 (30.0%)                                                                | 0.467   |
| Chest tightness                       | 20 (19.4%)                                                              | 7 (23.3%)                                                                | 0.615   |
| Hemoptysis                            | 5 (4.9%)                                                                | 1 (3.3%)                                                                 | 1.000   |
| Dizziness                             | 8 (7.8%)                                                                | 4 (13.3%)                                                                | 0.467   |
| Headache                              | 15 (14.6%)                                                              | 2 (6.7%)                                                                 | 0.358   |
| Runny                                 | 10 (9.7%)                                                               | 1 (3.3%)                                                                 | 0.455   |
| Stuffy nose                           | 2 (1.9%)                                                                | 2 (6.7%)                                                                 | 0.219   |
| Sore throat                           | 11 (10.7%)                                                              | 1 (3.3%)                                                                 | 0.297   |
| Anorexia                              | 32 (31.1%)                                                              | 15 (50.0%)                                                               | 0.081   |
| Nausea                                | 14 (13.6%)                                                              | 6 (20.0%)                                                                | 0.393   |
| Vomiting                              | 11 (10.7%)                                                              | 1 (3.3%)                                                                 | 0.297   |
| Abdominal pain                        | 3 (2.9%)                                                                | 1 (3.3%)                                                                 | 1.000   |
| Diarrhea                              | 46 (44.7%)                                                              | 17 (56.7%)                                                               | 0.301   |
| Treatment plan                        |                                                                         |                                                                          |         |
| Ritonavir                             | 83 (80.60%)                                                             | 29 (96.7%)                                                               | 0.033   |
| Prezista                              | 13 (12.6%)                                                              | 4 (13.3%)                                                                | 1.000   |

|                                                 |                          |                         |        |
|-------------------------------------------------|--------------------------|-------------------------|--------|
| Arbidol                                         | 27 (26.2%)               | 8 (26.7%)               | 1.000  |
| Ribavirin                                       | 34 (33.0%)               | 8 (26.7%)               | 0.656  |
| Chloroquine                                     | 20 (19.4%)               | 6 (20.0%)               | 1.000  |
| Interferon                                      | 103 (100.0%)             | 28 (93.3%)              | 0.050  |
| Antibiotics                                     | 24 (23.3%)               | 10 (33.3%)              | 0.341  |
| Mechanical ventilation                          | 12 (11.7%)               | 2 (6.7%)                | 0.656  |
| Laboratory test results - (median [IQR])        |                          |                         |        |
| White blood cell count, x 10 <sup>9</sup> per L | 6.16 [4.69, 8.36]        | 6.86 [5.71, 9.07]       | 0.060  |
| Neutrophil count, x 10 <sup>9</sup> per L       | 3.91 [2.81, 5.90]        | 4.06 [3.67, 7.29]       | 0.044  |
| Lymphocyte count, x 10 <sup>9</sup> per L       | 1.57 [1.27, 2.03]        | 1.79 [1.35, 2.26]       | 0.207  |
| Platelet count, x 10 <sup>9</sup> per L         | 246.00 [197.50, 341.00]  | 256.50 [229.50, 314.50] | 0.596  |
| Haemoglobin, g/L                                | 136.00 [126.50, 149.00]  | 138.00 [132.25, 150.50] | 0.390  |
| Monocyte count, x 10 <sup>9</sup> per L         | 0.47 [0.38, 0.66]        | 0.55 [0.48, 0.73]       | 0.016  |
| Red blood cell count, x 10 <sup>12</sup> per L  | 4.47 [4.14, 4.84]        | 4.53 [4.20, 4.90]       | 0.410  |
| Procalcitonin, ng/mL                            | 0.03 [0.02, 0.06]        | 0.03 [0.02, 0.09]       | 0.255  |
| C-reactive protein, mg/L                        | 11.33 [2.91, 32.91]      | 15.04 [2.80, 64.84]     | 0.252  |
| D-dimer, µg/mL                                  | 0.25 [0.14, 0.68]        | 0.18 [0.11, 0.54]       | 0.294  |
| Fibrinogen, g/L                                 | 4.37 [3.32, 5.19]        | 4.53 [3.41, 5.43]       | 0.382  |
| Prothrombin time, s                             | 12.00 [11.30, 12.50]     | 12.10 [11.43, 12.83]    | 0.205  |
| Activated partial thromboplastin time, s        | 39.70 [36.00, 43.20]     | 40.50 [37.40, 47.00]    | 0.191  |
| International normalized ratio                  | 0.96 [0.92, 0.99]        | 0.97 [0.93, 1.02]       | 0.174  |
| CD4 <sup>+</sup> T cell, per µl                 | 422.00 [273.50, 607.00]  | 209.00 [133.00, 331.75] | <0.001 |
| CD8 <sup>+</sup> T cell, per µl                 | 300.00 [182.00, 481.50]  | 152.50 [121.75, 356.75] | 0.002  |
| CD4 <sup>+</sup> T /CD8 <sup>+</sup> T cell     | 1.42 [1.13, 1.96]        | 1.21 [0.84, 1.55]       | 0.036  |
| CD3 <sup>+</sup> T cell, per µl                 | 801.00 [537.00, 1110.50] | 398.00 [271.00, 852.50] | <0.001 |
| γ-interferon, pg/mL                             | 1.85 [1.35, 2.75]        | 1.72 [1.18, 3.00]       | 0.826  |
| TNF-α, pg/mL                                    | 1.58 [0.97, 2.53]        | 1.29 [0.92, 3.71]       | 0.723  |
| IL-10, pg/mL                                    | 4.77 [2.89, 6.28]        | 7.36 [5.14, 10.97]      | <0.001 |
| IL-6, pg/mL                                     | 7.87 [4.06, 12.93]       | 35.96 [28.32, 54.74]    | <0.001 |
| IL-4, pg/mL                                     | 1.10 [0.69, 1.72]        | 1.18 [0.55, 1.84]       | 0.972  |
| IL-2, pg/mL                                     | 1.19 [0.95, 1.59]        | 1.42 [0.92, 2.35]       | 0.475  |
| IL-17A, pg/mL                                   | 13.53 [5.95, 18.80]      | 19.51 [6.52, 30.50]     | 0.109  |

Note: COVID-19 patients with liver injury during hospitalization were recruited and 12 patients with existing liver disease were excluded in the present study. All the parameters of laboratory test used during hospitalization were the peak values. Patients with severe liver injury were defined as follows: alanine aminotransferase (ALT) and/or aspartate aminotransferase (AST)>3 times upper limit of normal (ULN), alkaline phosphatase (ALP)>2.5 times ULN, and/or total bilirubin (TBIL)>1.5 times ULN. Mild liver injury was defined as any elevation of ALT, AST, ALP and TBIL

above ULN without meeting the criteria for severe liver injury. Categorical variables were presented as number and percentage (no. (%)). Continuous variables were presented as mean  $\pm$  standard deviation (SD) or median with interquartile range (IQR).
